# Supplementary material for: Development of a fraction collection approach in capillary electrophoresis SELEX for aptamer selection
Source: Royal Society of Chemistry journal article supplement (doi:10.1039/c5an00183h), 2015-01-01
Supplement: c5an00183h1.pdf [file c5an00183h1.pdf]

## **Supporting Information**

### Development of a Fraction collection Approach in Capillary Electrophoresis SELEX for Apatmer Selection

Zhaofeng Luo,<sup>a,\*</sup> Hongmin Zhou,<sup>a</sup> Hao Jiang,<sup>a</sup> Huichao Ou,<sup>a</sup> Xin Li<sup>b</sup> and Liyun  
Zhang<sup>b,\*</sup>

<sup>a</sup>Hefei National Laboratory for Physical Science at the Microscale, Core Facility  
Center for Life Sciences, School of Life Sciences, University of Science and  
Technology of China, Hefei 230026, P. R. China

<sup>b</sup>Institute of Technical Biology and Agriculture Engineering, Key Laboratory of Ion  
Beam Bioengineering, Hefei Institutes of Physical Science, Chinese Academy of  
Sciences, Hefei, Anhui 230031, P. R. China.

Table S1. Sequences and Affinities of DNA used in this study

| Name                  | Sequence                                          |
|-----------------------|---------------------------------------------------|
| Library               | AGCAGCACAGAGGTCAGATG(N40)<br>CCTATGCGTGCTACCGTGAA |
| Forward primer        | AGCAGCACAGAGGTCAGATG                              |
| Reverse primer        | TTCACGGTAGCACGCATAGG                              |
| *FAM-FP               | FAM-AGCAGCACAGAGGTCAGATG                          |
| RP-polyA <sup>#</sup> | A <sub>20</sub> -linker-TTCACGGTAGCACGCATAGG      |

\*FAM: 6-carboxyfluorescein

# Linker is hexaethylene glycol; A<sub>20</sub> is 20-nucleotides length of a string of adenosine.

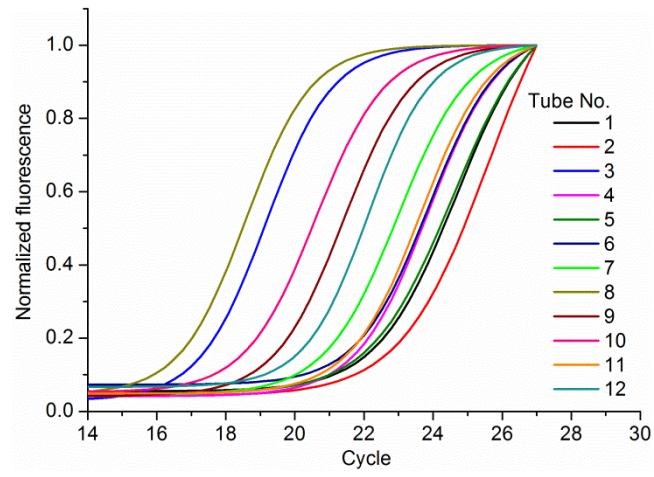

Fig.S1. Amplification curves of real-time PCR for every fraction collection apatmer.

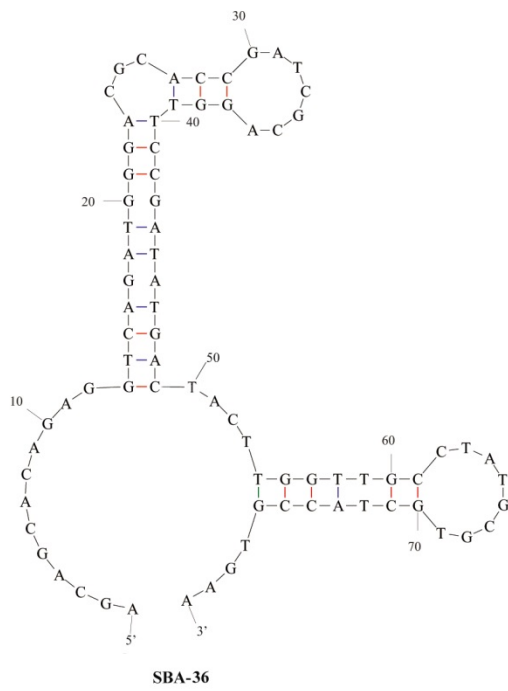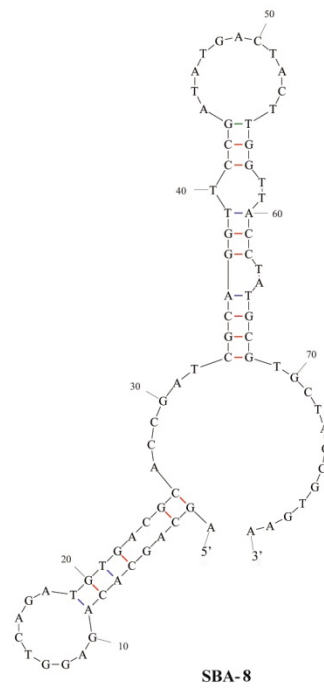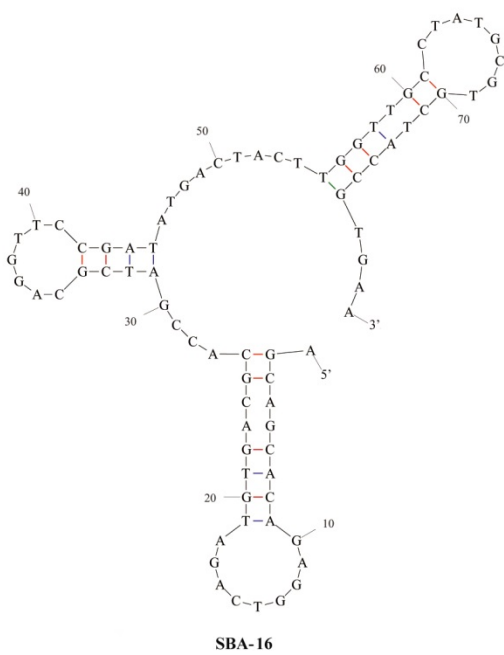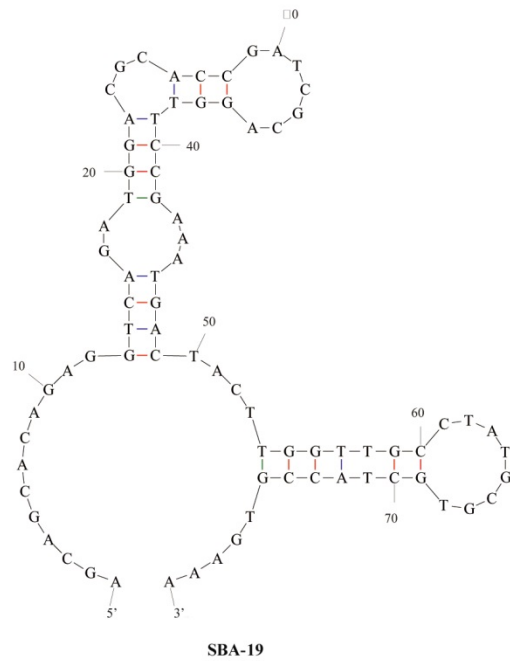

**Figure S2.** The predicted secondary structures of SA aptamers
